# Supplementary material for: Herbal or traditional medicine consumption in a Thai worker population: pattern of use and therapeutic control in chronic diseases
Source: Springer Nature journal article supplement (doi:10.1186/s12906-019-2652-z), 2019-09-18

\* p<0.05

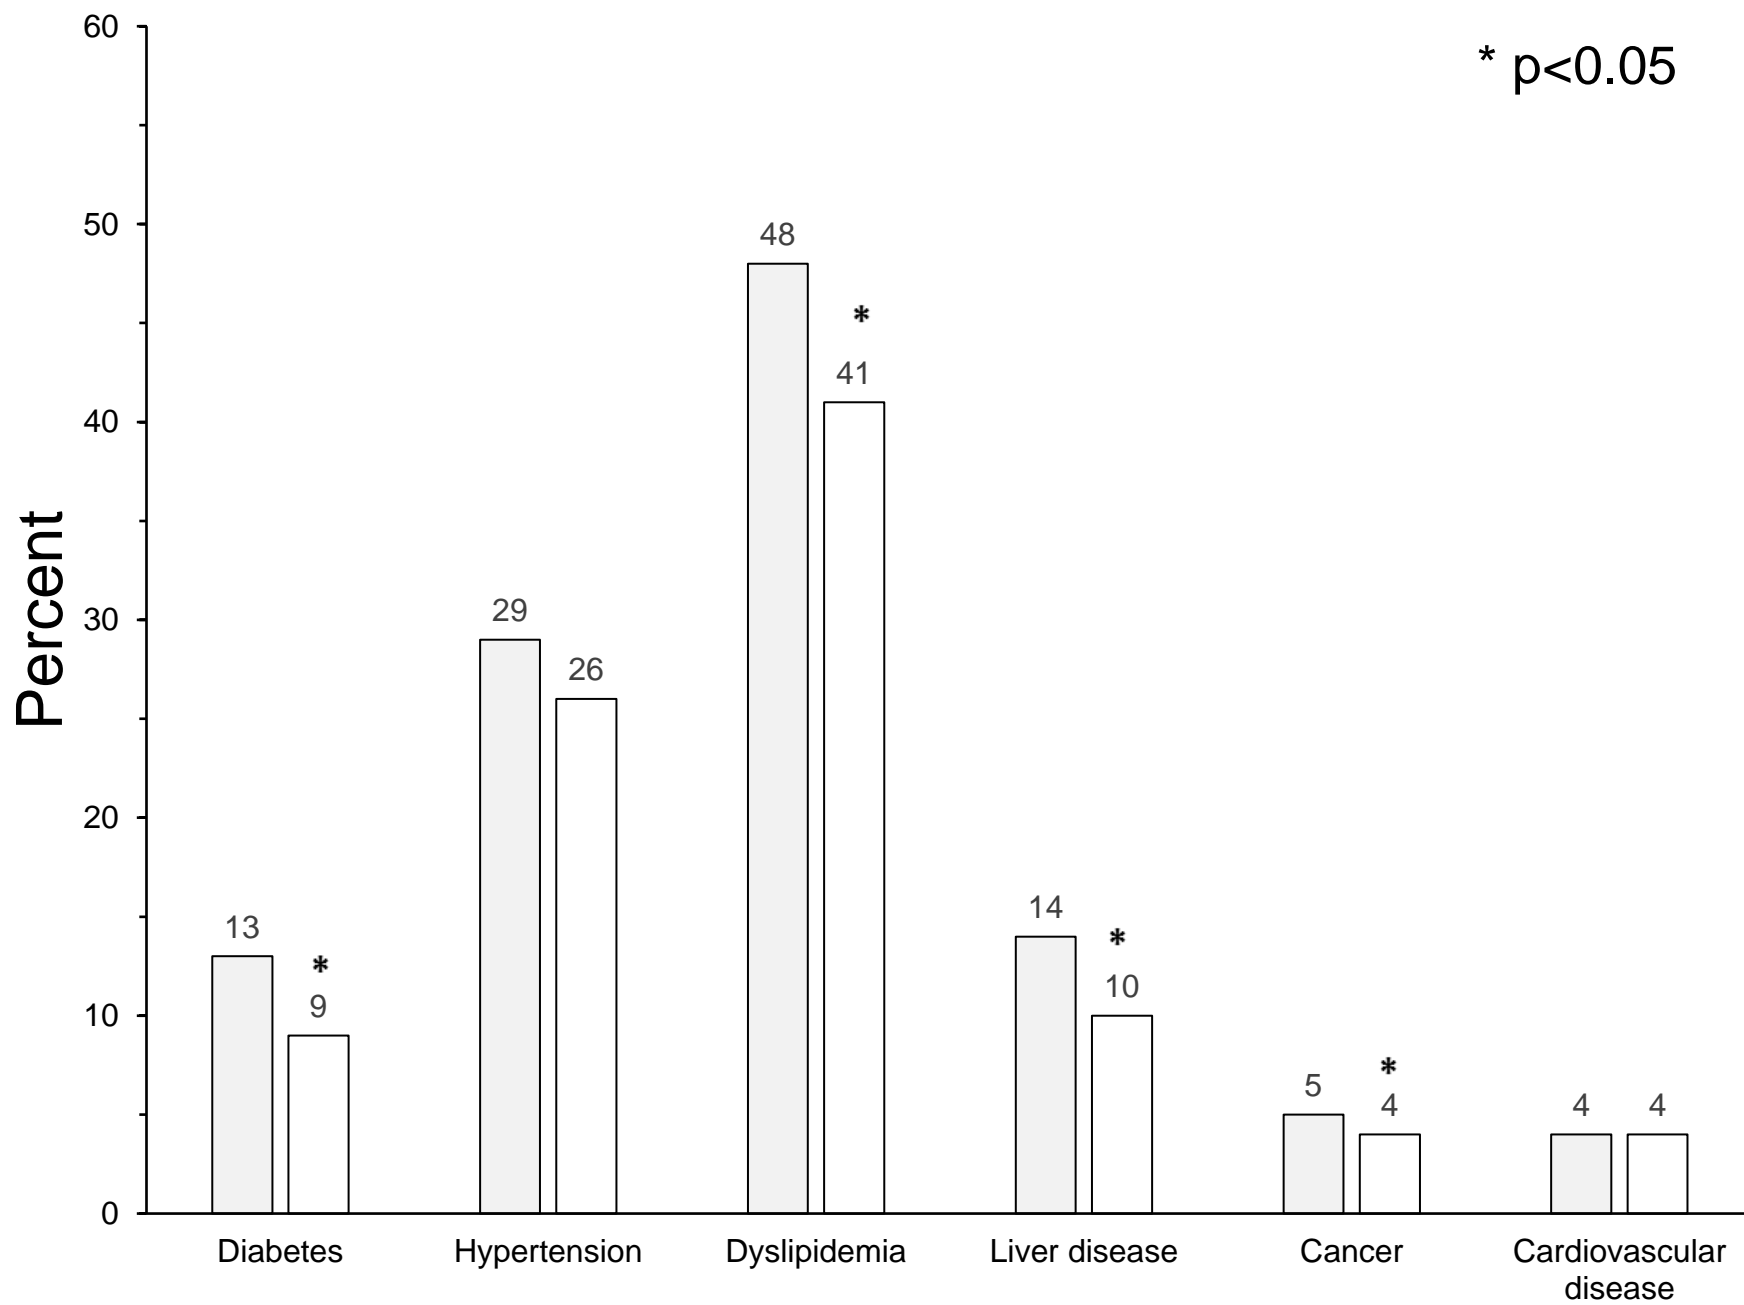

Supplement: MOESM3 [file 17185344]
